# Supplementary material for: Unraveling function and diversity of bacterial lectins in the human microbiome
Source: PubMed Central journal article supplement (PMC9166713; doi:10.1038/s41467-022-29949-3), 2022-06-03
Supplement: 41467_2022_29949_MOESM1_ESM.pdf [file 41467_2022_29949_MOESM1_ESM.pdf]

**Supplementary Information: Unraveling function and diversity of bacterial lectins in the human microbiome**

**L Cohen et al.**

**A** PBMC Gating Strategy

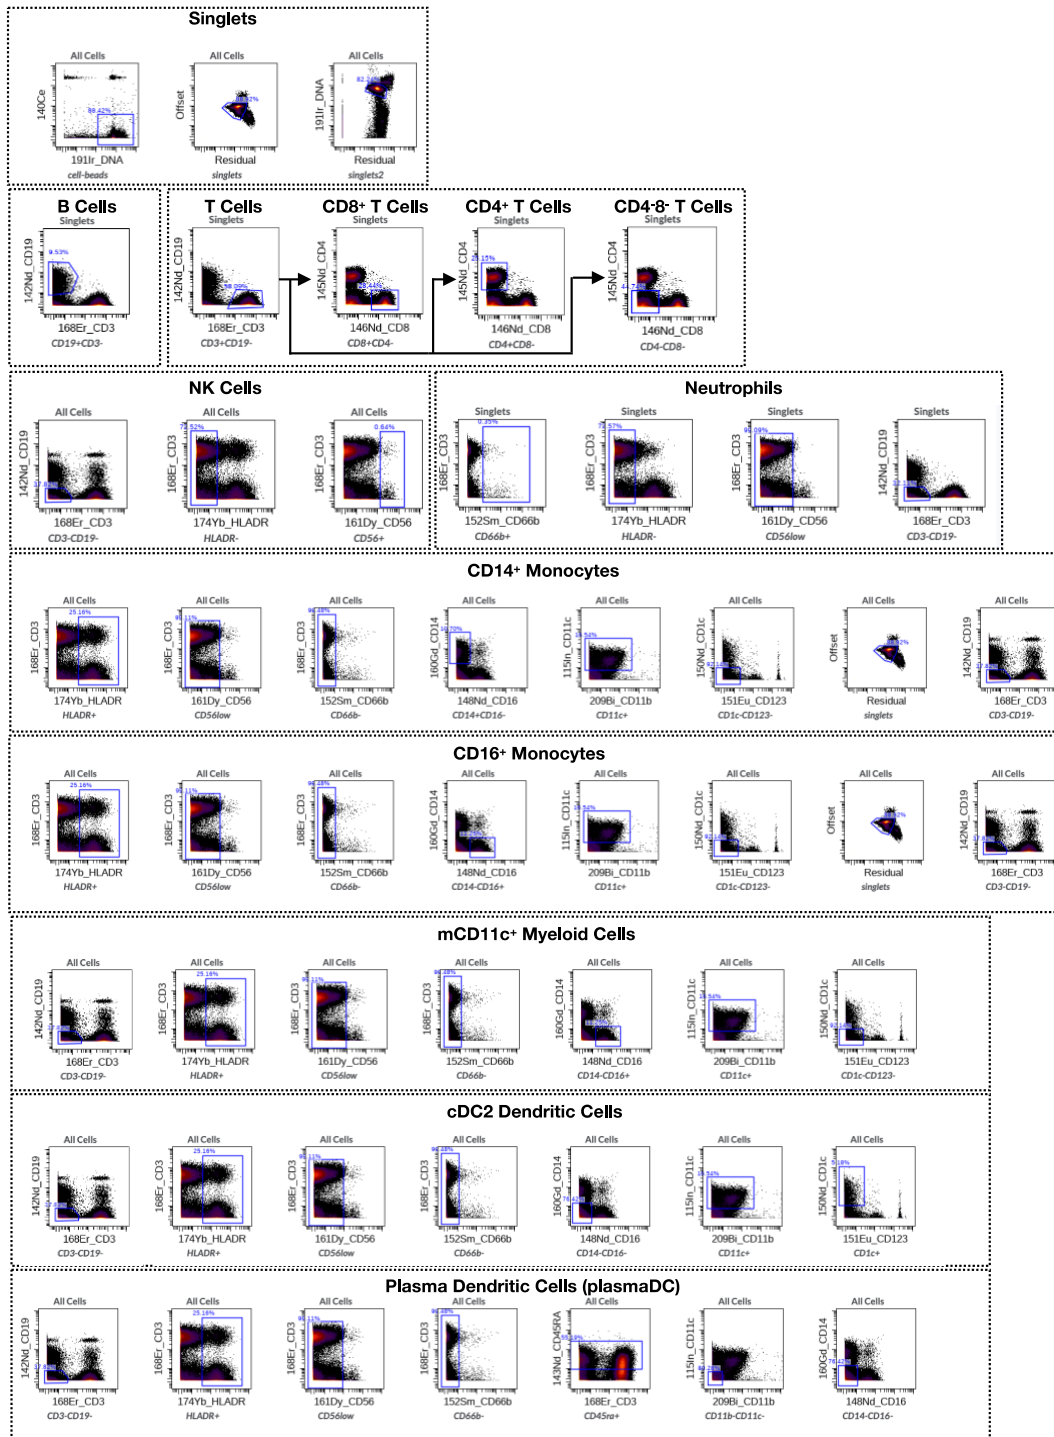

**B** Colon Leukocytes Gating Strategy

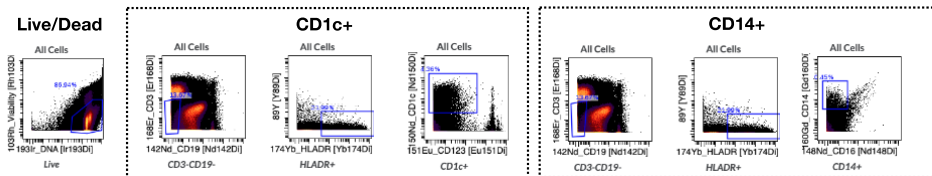

**Supplementary Figure 1.** Leukocytes analyzed by CyTOF using a panel of 16 cell surface markers. **a**, Gating corresponds to Fig 2 and Extended Data Fig 2. **b**, Gating corresponds to Fig 3 and Extended Data Fig 3

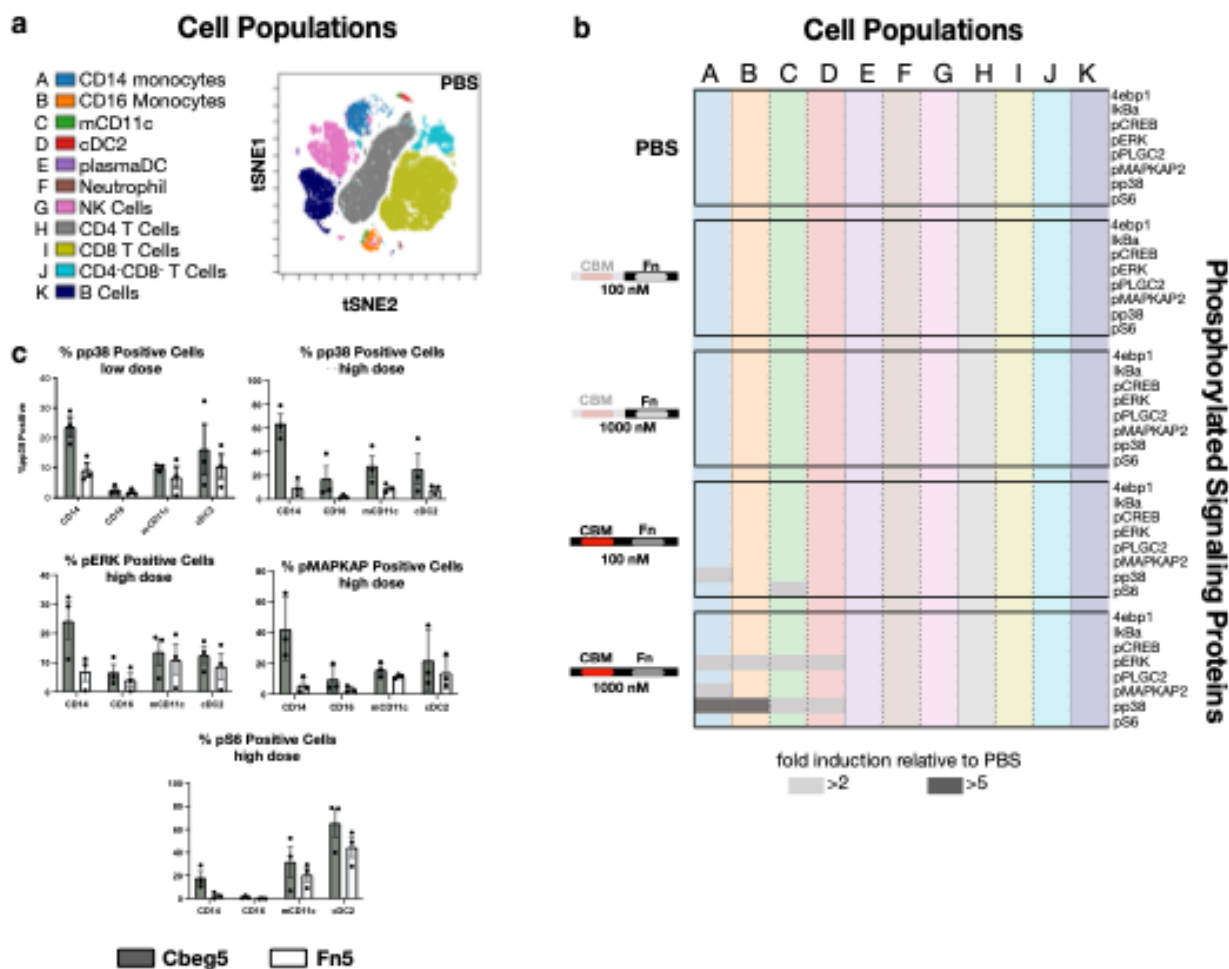

**Supplementary Figure 2.** Fresh PBMC were isolated from healthy patients and exposed to Cbeg5, Fn5 and PBS for 6h. PBMC were analyzed by CyTOF with a panel of 16 cell surface and 10 cytokine markers. **a**, Cell surface markers distinguish major immune cell populations (A-K) that correlate to groups identified by tSNE analysis (1 representative experiment with PBS). **b**, Fold induction of 8 phosphorylated signaling proteins across cell populations A-K from **(a)**. Fold induction is calculated relative to PBS control. Cytokine responses > 2 fold to > 5 fold are marked with grey shaded boxes. Proteins assayed at 100 nM or 1000 nM as indicated. (Data is a single experiment. PBS data is normalized to a replicate experiment with PBS). **c**, Bargraph (mean +/- s.e.m) of percent positive cells for each cytokine in specific cell populations in response to Cbeg5 or Fn5 at low dose (100nM) or high dose (500-1000 nM) concentrations (N = 3 from three independent experiments, unpaired, two sided Mann-Whitney test comparing Cbeg5 to Fn5 for each cell population)  $p > 0.05$

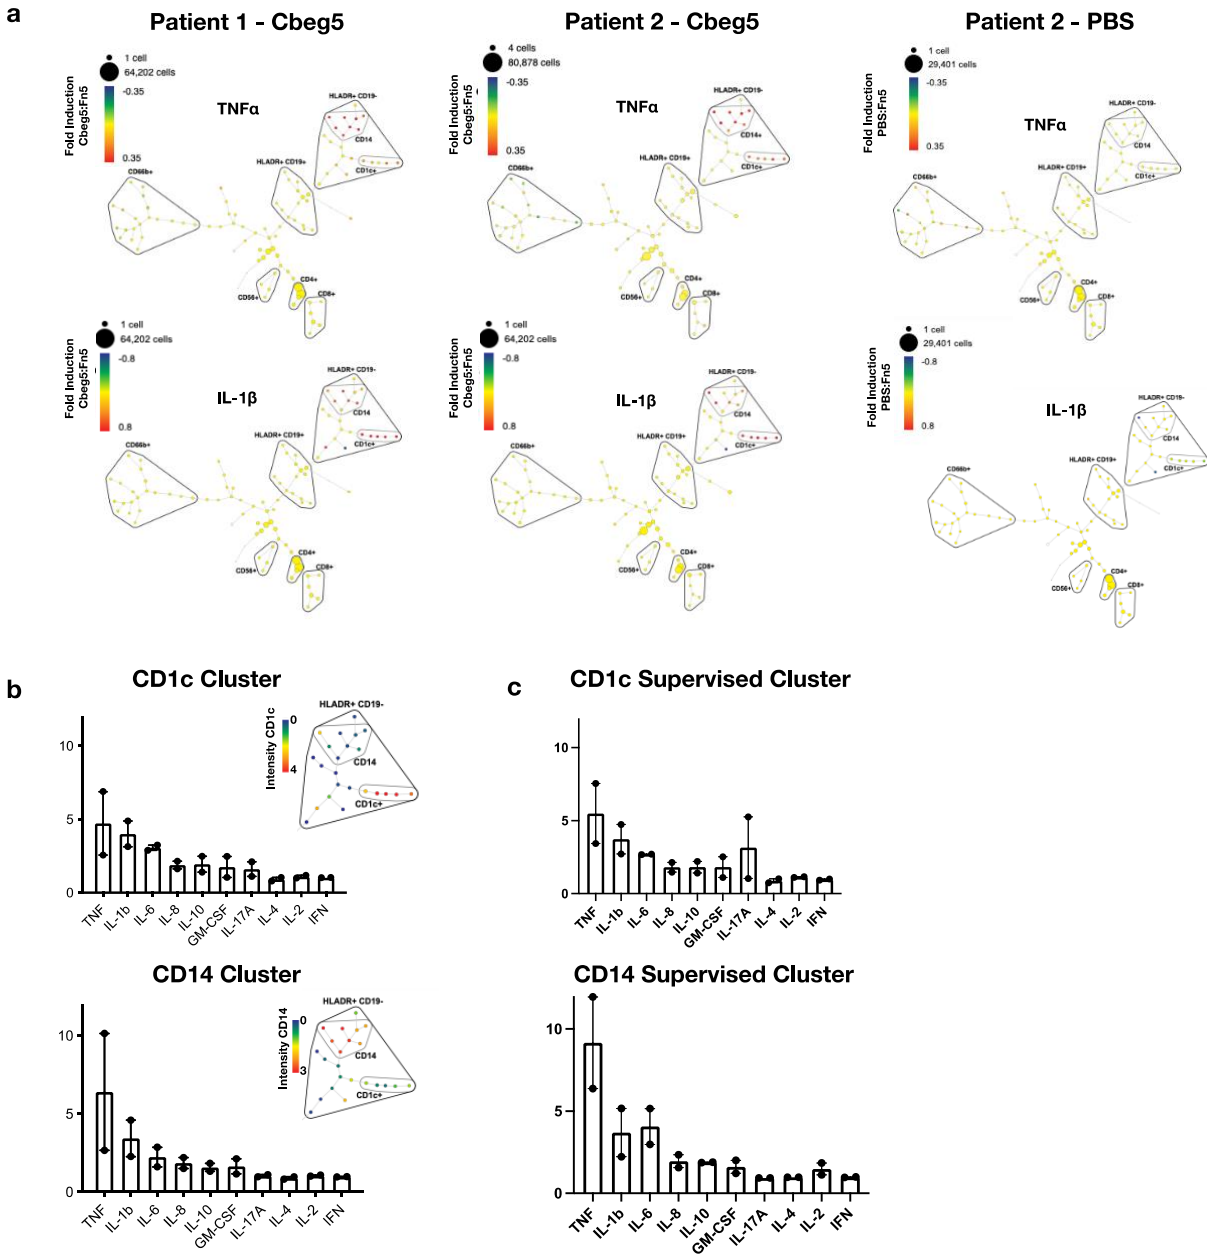

**Supplementary Figure 3.** Fresh colon tissue was obtained from patients at the time of surgery for isolation of lamina propria leukocytes (LPL). LPL cells were exposed to Cbeg5, Fn5 and PBS for 6 hours then analyzed by CyTOF using the same markers as the PBMC assay **a**, A SPADE plot for Cbeg5 and PBS induced TNF- $\alpha$  and IL-1 $\beta$  from LPL (Cbeg5 - two patient samples, PBS - one patient sample). **b**, Bar graphs of Cbeg5 induced cytokine production from cells in the CD14 cluster (CD14 stain intensity inset) and CD1c cluster (CD1c stain intensity inset) (mean  $\pm$  s.e.m, N=2, two independent experiments). **c**, Bar graphs of Cbeg5 induced cytokine production from CD14+ and CD1c+ cells identified through supervised clustering (Extended Data Figure 1 for gating strategy, mean  $\pm$  s.e.m., N=2, two independent experiments).

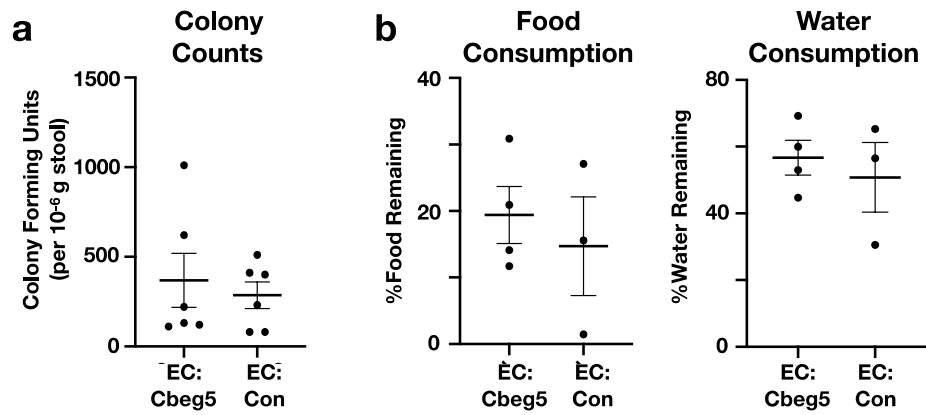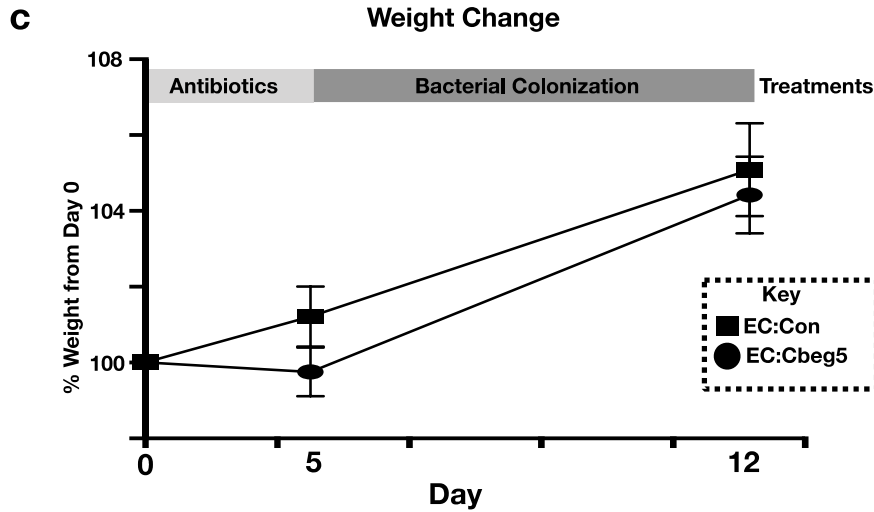

**d Histologic Scoring of Colon Inflammation**

| Score 1 Inflammatory Cell Infiltrate |                      |       | Score 2 Intestinal Architecture |                        |  |
|--------------------------------------|----------------------|-------|---------------------------------|------------------------|--|
| Severity                             | Extent               | Score | Treatment EC:Cbeg5 (n = 12)     | Control EC:Con (n = 9) |  |
| None                                 |                      | 0     |                                 |                        |  |
| Mild                                 | Mucosa               | 1     | 12                              | 9                      |  |
| Moderate                             | Mucosa and submucosa | 2     |                                 |                        |  |
| Marked                               | Transmural           | 3     |                                 |                        |  |

  

| Epithelial changes | Mucosal architecture                                     | Score | Treatment EC:Cbeg5 (n = 12) | Control EC:Con (n = 9) |
|--------------------|----------------------------------------------------------|-------|-----------------------------|------------------------|
| Focal erosions     |                                                          | 1     | 12                          | 9                      |
| Erosions           | ± Focal ulcerations                                      | 2     |                             |                        |
|                    | Extended ulcerations ± granulation tissue ± pseudopolyps | 3     |                             |                        |

Total Score = Sum of Score 1 + Score 2 (0-6)

**Supplementary Figure 4.** Wild-type 8 week C57BL/6 mice were colonized with *E. coli* engineered to express *Cbeg5* (Treatment, EC:Cbeg5) or *E. coli* with an empty vector (Control, EC:Con). Mice were treated for 5 days with ampicillin 500  $\mu\text{g ml}^{-1}$  in the drinking water after which mice were gavaged with bacteria and colonized for 1 week. **a**, Analysis of colony forming units for each bacteria (EC:Cbeg5, EC:Con) in stool day 4 after gavage. (N = 6 for each group, unpaired, two-tailed *t*-test  $p > 0.05$ ) **b**, Food and water consumption was measured from the time of colonization and analyzed on a per cage basis. There was no significant difference in food or water consumption after 1 week between the two groups (N = 4 cages for EC:Cbeg5, N = 3 cages for EC:Con; graphs are mean  $\pm$  s.e.m; groups compared by unpaired, two-tailed *t*-test,  $p > 0.05$ ) **c**, Weight was measured per mouse on arrival to the facility (day 0) after initial antibiotic administration (day 5) and at completion of the study (day 12). There was no significant difference in weight change between the two treatment groups (N = 12 for EC:Cbeg5, N = 9 for EC:Con; graphs are mean  $\pm$  s.e.m; groups compared by 2-way ANOVA,  $p > 0.05$  for the trend). **d**, After 1 week of bacterial colonization colon tissue was formalin fixed and sent to Histowiz for analysis by a pathologist. There was no difference between treatment groups for histologic scoring of inflammation (all mice had a total score of 2).

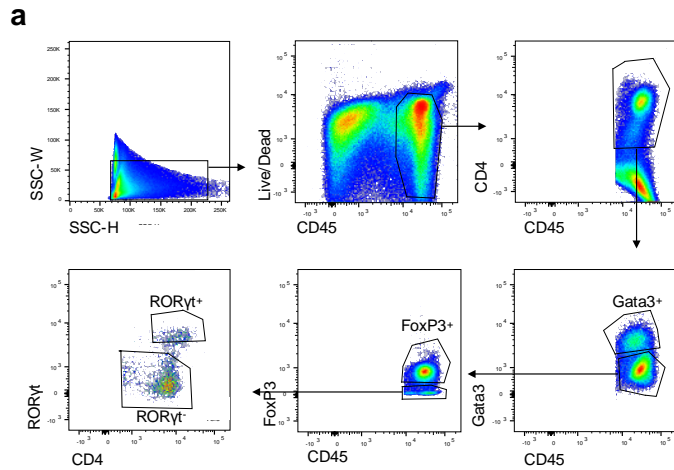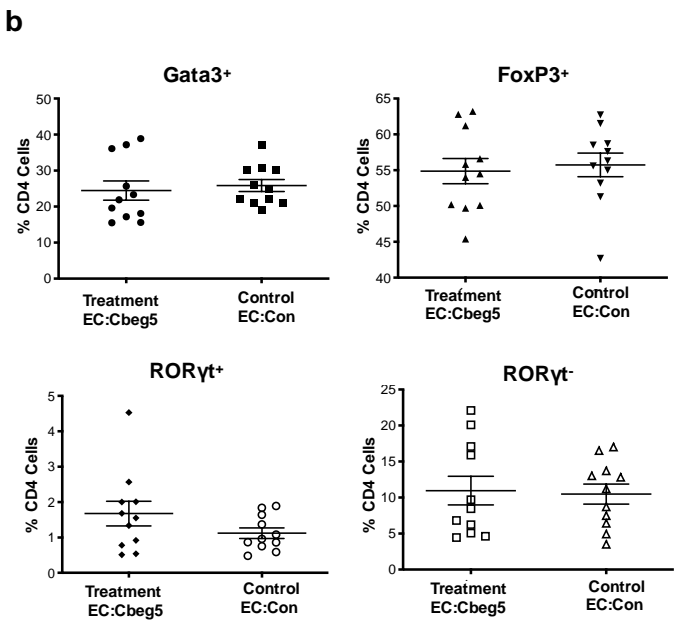

**Supplementary Figure 5.** Wild-type 8 week C57BL/6 mice were colonized with *E. coli* engineered to express *Cbeg5* (Treatment, EC:Cbeg5) or *E. coli* with an empty vector (Control, EC:Con). After 1 week of colonization the colon LPL were isolated and analyzed by flow cytometry. **a**, After gating for singlets and live cells (Aqua LIVE/DEAD) the gating schema is shown for identification of CD4<sup>+</sup> T cell populations based on transcription factors. T cells were gated into 4 populations. **b**, There was no significant difference in T cell populations between the two groups (N = 11 for EC:Cbeg5, N = 11 for EC:Con, error bars are mean +/- s.e.m. Data represents 2 independent experiments, groups compared by unpaired, two sided Mann-Whitney test,  $p > 0.05$ )

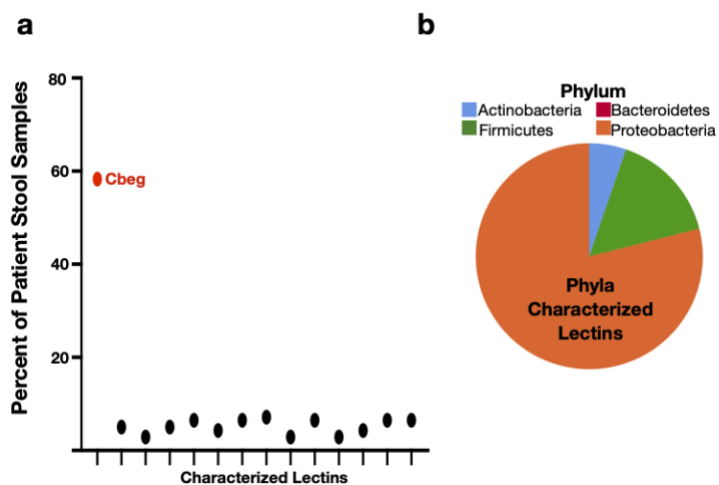

**Supplementary Figure 6.** A dataset of characterized lectin protein sequences (Unilectin) are searched against human microbiome sequencing datasets to identify highly similar sequences (BLASTP, >90% sequence similarity). **a**, Previously characterized lectins are in a small number of patient stool samples whereas *Cbeg4/5* are in a large percentage of patient stool samples. **b**, Characterized lectins are largely from proteobacterial species. No characterized lectins have been identified in Bacteroidetes species from which *Cbeg4* and *Cbeg5* were isolated.

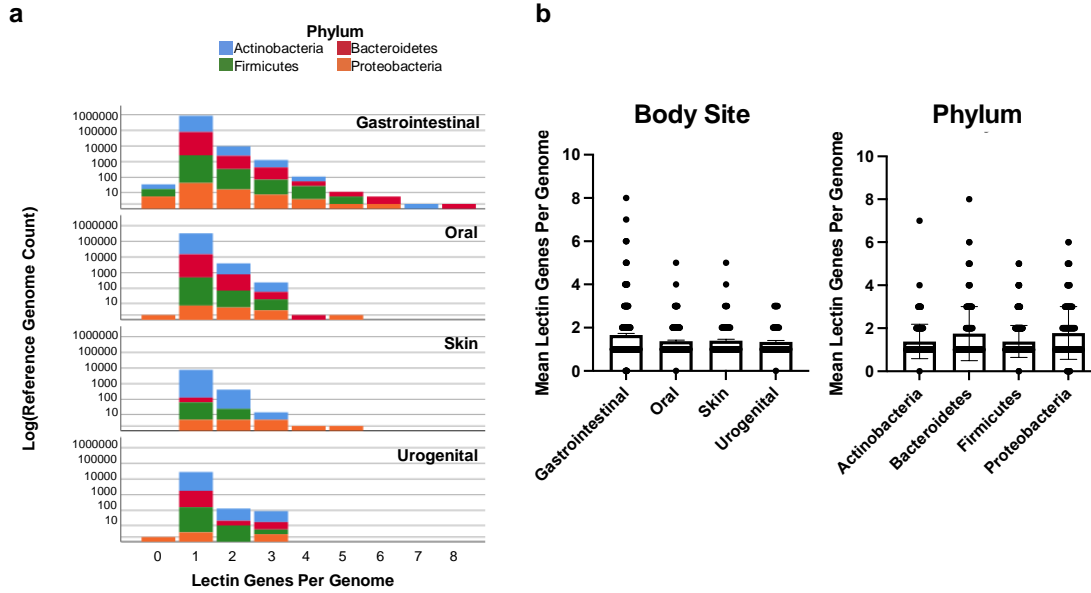

**Supplementary Figure 7. a**, Human-microbial-lectin dataset was aligned to a database of reference genome sequences generated from bacteria isolated at different sites in the human microbiome (Human Microbiome Project). The number of lectin genes per genome for each bacterial species was determined and plotted as a histogram. Data is presented based on body site from where the bacterium was isolated and is colored by the bacterial phylum. **b**, The mean number of human-microbial-lectin genes per genome is presented per body site and phylum. (Bar graphs are mean +/- s.e.m. , N=240 gastrointestinal, 184 oral, 107 skin, 95 urogenital ; N = 403 Firmicutes, 156 Actinobacteria, 152 Proteobacteria, 139 Bacteroidetes)



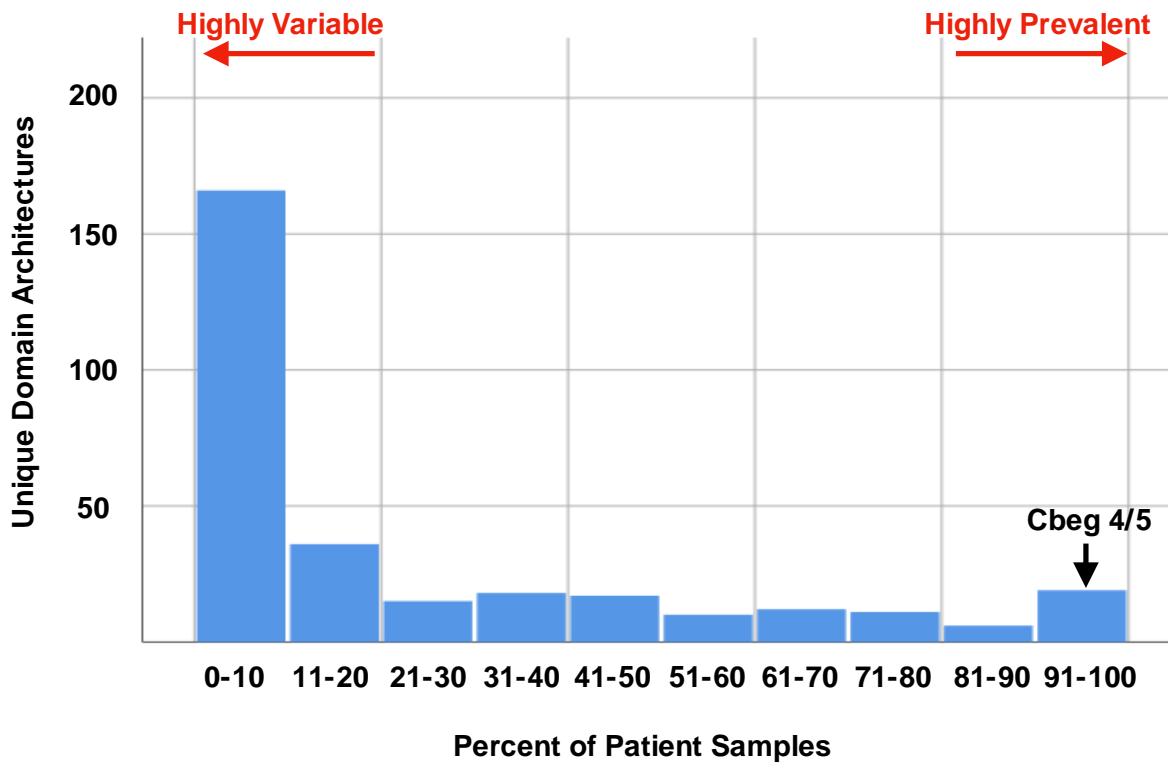

**Supplementary Figure 8.** In stool samples there are 2278 uncharacterized lectin protein sequences and 314 unique domain architectures. Certain domain architectures are highly prevalent across patient samples being identified in >90% of samples. For most domain architectures there is great variability across patients as they are identified only in <10% of samples. The domain architecture specific to Cbeg4/5 is highly prevalent.

**Supplementary Table 1.** Antibodies for cytometry (CyTOF, Flow)

| Channel | Marker      | Clone      | Manufacturer   | Panel          | Dilution |
|---------|-------------|------------|----------------|----------------|----------|
| 115In   | CD11c       | Bu15       | Biolegend      | Cytokine-Cytof | 1:100    |
| 141Pr   | IFNg        | B27        | Biolegend      | Cytokine-Cytof | 1:100    |
| 142Nd   | CD19        | HIB19      | Biolegend      | Cytokine-Cytof | 1:100    |
| 143Nd   | CD45RA      | H100       | Fluidigm       | Cytokine-Cytof | 1:100    |
| 144Nd   | IL-4        | MP4-25D2   | DVS            | Cytokine-Cytof | 1:100    |
| 145Nd   | CD4         | RPA-T4     | Biolegend      | Cytokine-Cytof | 1:100    |
| 146Nd   | CD8         | RPA-T8     | Biolegend      | Cytokine-Cytof | 1:100    |
| 147Sm   | IL-1b       | H1b-27     | Biolegend      | Cytokine-Cytof | 1:100    |
| 148Nd   | CD16        | 3G8        | Biolegend      | Cytokine-Cytof | 1:100    |
| 150Nd   | CD1c        | L161       | Biolegend      | Cytokine-Cytof | 1:100    |
| 151Eu   | CD123       | 6H6        | Biolegend      | Cytokine-Cytof | 1:100    |
| 152Sm   | CD66b       | G10F5      | Biolegend      | Cytokine-Cytof | 1:100    |
| 153Eu   | TNFa        | Mab11      | Biolegend      | Cytokine-Cytof | 1:100    |
| 155Gd   | CD27        | O323       | Biolegend      | Cytokine-Cytof | 1:100    |
| 156Gd   | IL-6        | MQ2-13AS   | Fluidigm       | Cytokine-Cytof | 1:100    |
| 158Gd   | <u>IL-2</u> | MQ1-17H12  | DVS            | Cytokine-Cytof | 1:100    |
| 159Tb   | GM-CSF      | BVD2-21C11 | DVS            | Cytokine-Cytof | 1:100    |
| 160Gd   | CD14        | M5E2       | Biolegend      | Cytokine-Cytof | 1:100    |
| 161Dy   | CD56        | B159       | BD Biosciences | Cytokine-Cytof | 1:100    |
| 164Dy   | IL17A       | N49-653    | DVS            | Cytokine-Cytof | 1:100    |
| 166Er   | IL-10       | JES3-9D7   | Biolegend      | Cytokine-Cytof | 1:100    |
| 168Er   | CD3         | UCHT1      | Biolegend      | Cytokine-Cytof | 1:100    |
| 170Er   | CD38        | HB-7       | Biolegend      | Cytokine-Cytof | 1:100    |
| 173Yb   | IL-8        | BH0814     | Biolegend      | Cytokine-Cytof | 1:100    |
| 174Yb   | HLADR       | L243       | Biolegend      | Cytokine-Cytof | 1:100    |
| 209Bi   | CD11b       | ICRF44     | Fluidigm       | Cytokine-Cytof | 1:100    |
| 113In   | CD57        | HCD57      | Biolegend      | Phospho-Cytof  | 1:100    |
| 115In   | CD11c       | Bu15       | Biolegend      | Phospho-Cytof  | 1:100    |
| 142Nd   | CD19        | HIB19      | Biolegend      | Phospho-Cytof  | 1:100    |
| 143Nd   | CD45RA      | HI100      | Biolegend      | Phospho-Cytof  | 1:100    |
| 145Nd   | CD4         | RPA-T4     | Biolegend      | Phospho-Cytof  | 1:100    |
| 146Nd   | CD8         | RPA-T8     | Biolegend      | Phospho-Cytof  | 1:100    |
| 148Nd   | CD16        | 3G8        | Biolegend      | Phospho-Cytof  | 1:100    |
| 149Sm   | 4ebp1       | 236B4      | Fluidigm       | Phospho-Cytof  | 1:100    |
| 150Nd   | CD1c        | 3G8        | Biolegend      | Phospho-Cytof  | 1:100    |
| 151Eu   | CD123       | L161       | Biolegend      | Phospho-Cytof  | 1:100    |
| 152Sm   | CD66b       | 6H6        | Biolegend      | Phospho-Cytof  | 1:100    |
| 155Gd   | CD27        | O323       | Biolegend      | Phospho-Cytof  | 1:100    |
| 156Gd   | pp38        | D3f9       | Fluidigm       | Phospho-Cytof  | 1:100    |

|                         |           |             |                |                           |        |
|-------------------------|-----------|-------------|----------------|---------------------------|--------|
| 159Tb                   | pMAPKAP2  | 27B7        | Fluidigm       | Phospho-Cytof             | 1:100  |
| 160Gd                   | CD14      | M5E2        | Biologend      | Phospho-Cytof             | 1:100  |
| 161Dy                   | CD56      | B159        | BD Biosciences | Phospho-Cytof             | 1:100  |
| 162Dy                   | p-PLCg2   | K86-689.37  | Fluidigm       | Phospho-Cytof             | 1:100  |
| 164Dy                   | IkBα      | L35A5       | Fluidigm       | Phospho-Cytof             | 1:100  |
| 165Ho                   | pCREB     | 87G3        | Fluidigm       | Phospho-Cytof             | 1:100  |
| 167Er                   | pERK      | D1314.4E    | Fluidigm       | Phospho-Cytof             | 1:100  |
| 168Er                   | CD3       | UCHT1       | Biologend      | Phospho-Cytof             | 1:100  |
| 170Er                   | CD38      | HB-7        | Biologend      | Phospho-Cytof             | 1:100  |
| 174Yb                   | HLADR     | L243        | Biologend      | Phospho-Cytof             | 1:100  |
| 175Lu                   | pS6       | N7-548      | Fluidigm       | Phospho-Cytof             | 1:100  |
| 209Bi                   | CD11b     | ICRF44      | Fluidigm       | Phospho-Cytof             | 1:100  |
| Zombie<br>Aqua          | Viability | NA          | Biologend      | Mouse T Cell +<br>Myeloid | 1:1000 |
| APC-Cy7                 | CD45      | 30-F11      | Biologend      | Mouse T Cell +<br>Myeloid | 1:100  |
| APC                     | CD4       | RM4-5       | Biologend      | Mouse T Cell              | 1:100  |
| PacBlue                 | MHCII     | M5/114.15.2 | Biologend      | Mouse Myeloid             | 1:1000 |
| PerCPCCy5.5             | CD11b     | M1/70       | BD Biosciences | Mouse Myeloid             | 1:1000 |
| PE-Cy7                  | CD11c     | N418        | Biologend      | Mouse Myeloid             | 1:1000 |
| FITC                    | Ly6C      | HK1.4       | Biologend      | Mouse Myeloid             | 1:100  |
| PE                      | CD64      | X54-5/7.1   | Biologend      | Mouse Myeloid             | 1:100  |
| PerCPCCy5.5             | RORyt     | Q31-378     | BD Biosciences | Mouse T Cell              | 1:100  |
| PE                      | FoxP3     | FJK-16s     | eBioScience    | Mouse T Cell              | 1:100  |
| Brilliant<br>Violet 421 | Gata3     | 16E10A23    | Biologend      | Mouse T Cell              | 1:100  |

**Supplementary Table 2.** Characterized lectins in the human microbiome

| Uniprot ID | Protein names                                                                                                                                                                                                                                                  | Organism                                                                  | Interpro Domain                                                                  |
|------------|----------------------------------------------------------------------------------------------------------------------------------------------------------------------------------------------------------------------------------------------------------------|---------------------------------------------------------------------------|----------------------------------------------------------------------------------|
| A0A0V9HGB3 | Fimbrial adhesin (Fimbrial protein) (Putative fimbrial-like exported adhesin protein)                                                                                                                                                                          | Escherichia coli                                                          | IPR036937;IPR008966;IPR015243;                                                   |
| A0A140UH97 | FimG protein                                                                                                                                                                                                                                                   | Escherichia coli O6:K15:H31 (strain 536 / UPEC)                           |                                                                                  |
| A0A182DW20 | PapG, lectin domain                                                                                                                                                                                                                                            | Escherichia coli                                                          | IPR008966;IPR005310;IPR038420;                                                   |
| A0A2J7MV87 | Fimbrial adhesin (Fimbrial protein) (Fimbrial-like adhesin protein) (Putative fimbrial-like adhesin protein)                                                                                                                                                   | Escherichia coli                                                          | IPR036937;IPR008966;IPR015243;                                                   |
| A3CM52     | Platelet-binding glycoprotein                                                                                                                                                                                                                                  | Streptococcus sanguinis (strain SK36)                                     | IPR019948;IPR022263;IPR019931;IPR026465;                                         |
| O52269     | Adhesin binding fucosylated histo-blood group antigen                                                                                                                                                                                                          | Helicobacter pylori (Campylobacter pylori)                                | IPR002718;IPR040838;                                                             |
| P08189     | Protein FimF                                                                                                                                                                                                                                                   | Escherichia coli (strain K12)                                             | IPR000259;IPR036937;IPR008966;                                                   |
| P08190     | Protein FimG                                                                                                                                                                                                                                                   | Escherichia coli (strain K12)                                             | IPR036937;IPR008966;                                                             |
| P08191     | Type 1 fimbrin D-mannose specific adhesin (Protein FimH)                                                                                                                                                                                                       | Escherichia coli (strain K12)                                             | IPR000259;IPR036937;IPR008966;IPR015243;                                         |
| P31697     | Chaperone protein FimC                                                                                                                                                                                                                                         | Escherichia coli (strain K12)                                             | IPR013783;IPR008962;IPR036316;IPR001829;IPR016148;IPR018046;IPR016147;           |
| Q2PHL4     | Thiol-activated cytolysin                                                                                                                                                                                                                                      | Streptococcus mitis                                                       | IPR000421;IPR006585;IPR008979;IPR035390;IPR038700;IPR001869;IPR036363;IPR036359; |
| Q47450     | Uncharacterized protein                                                                                                                                                                                                                                        | Escherichia coli                                                          | IPR036937;IPR008966;IPR005310;IPR038420;IPR005309;                               |
| Q7U0N6     | Fumarate hydratase class II (Fumarase C) (EC 4.2.1.2) (Aerobic fumarase) (Iron-independent fumarase)                                                                                                                                                           | Mycobacterium bovis (strain ATCC BAA-935 / AF2122/97)                     | IPR005677;IPR024083;IPR018951;IPR020557;IPR000362;IPR022761;IPR008948;           |
| Q939N5     | Platelet binding protein GspB (Adhesin GspB) (Serine-rich adhesin for platelets) (Serine-rich repeat protein GspB)                                                                                                                                             | Streptococcus gordonii                                                    | IPR019948;IPR022263;IPR019931;IPR026465;                                         |
| Q9AP05     | FimH                                                                                                                                                                                                                                                           | Escherichia coli                                                          | IPR000259;IPR036937;IPR008966;IPR015243;                                         |
| Q9AYY6     | Tail spike protein                                                                                                                                                                                                                                             | Enterobacteria phage HK620 (Bacteriophage HK620)                          | IPR009093;IPR036730;IPR012334;IPR011050;IPR041303;                               |
| Q9F5R9     | FimH                                                                                                                                                                                                                                                           | Escherichia coli                                                          | IPR036937;IPR008966;IPR015243;                                                   |
| Q9F6Z7     | FimH (FimH protein) (Fimbrial protein) (Minor component of type 1 fimbriae) (Protein FimH) (Type 1 fimbria D-mannose specific adhesin FimH) (Type 1 fimbriae D-mannose specific adhesin FimH) (Type 1 fimbrial adhesin) (Type 1 fimbrial adhesin subunit FimH) | Escherichia coli                                                          | IPR000259;IPR036937;IPR008966;IPR015243;                                         |
| Q9S497     | FimH                                                                                                                                                                                                                                                           | Escherichia coli                                                          | IPR000259;IPR036937;IPR008966;IPR015243;                                         |
| Q9ZKV2     | Outer membrane protein-adhesin                                                                                                                                                                                                                                 | Helicobacter pylori (strain J99 / ATCC 700824) (Campylobacter pylori J99) | IPR002718;IPR040838;                                                             |

**Supplementary Table 3. Carbohydrate binding domains from Interpro**

| Interpro ID | Description                                                                          | Interpro ID | Description                                                                |
|-------------|--------------------------------------------------------------------------------------|-------------|----------------------------------------------------------------------------|
| IPR000254   | Cellulose-binding domain, fungal                                                     | IPR009011   | Mannose-6-phosphate receptor binding domain superfamily                    |
| IPR000296   | Cation-dependent mannose-6-phosphate receptor                                        | IPR009031   | Carbohydrate binding module family 10                                      |
| IPR000479   | Cation-independent mannose-6-phosphate receptor                                      | IPR009342   | Putative carbohydrate binding domain                                       |
| IPR000772   | Ricin B, lectin domain                                                               | IPR009960   | Fungal fruit body lectin                                                   |
| IPR000922   | D-galactoside/L-rhamnose binding SUEL lectin domain                                  | IPR010502   | Carbohydrate-binding domain, family 9                                      |
| IPR000985   | Legume lectin, alpha chain, conserved site                                           | IPR010907   | Calcium-mediated lectin                                                    |
| IPR001079   | Galectin, carbohydrate recognition domain                                            | IPR011611   | Carbohydrate kinase PfkB                                                   |
| IPR001101   | Plectin repeat                                                                       | IPR012111   | Hemolectin/hemocytin                                                       |
| IPR001220   | Legume lectin domain                                                                 | IPR012291   | CBM2, carbohydrate-binding domain superfamily                              |
| IPR001229   | Jacalin-like lectin domain                                                           | IPR012475   | Fucose-specific lectin                                                     |
| IPR001304   | C-type lectin-like                                                                   | IPR013320   | Concanavalin A-like lectin/glucanase domain superfamily                    |
| IPR001480   | Bulb-type lectin domain                                                              | IPR013784   | Carbohydrate-binding-like fold                                             |
| IPR001538   | Mannose-6-phosphate isomerase, type II, C-terminal                                   | IPR014718   | Glycoside hydrolase-type carbohydrate-binding                              |
| IPR001732   | UDP-glucose/GDP-mannose dehydrogenase, N-terminal                                    | IPR015243   | FimH, mannose-binding domain                                               |
| IPR001919   | Carbohydrate-binding type-2 domain                                                   | IPR015295   | Carbohydrate binding module 27                                             |
| IPR001956   | Carbohydrate-binding module 3                                                        | IPR015303   | Fimbrial adhesin F17-AG, lectin domain                                     |
| IPR002044   | Carbohydrate binding module family 20                                                | IPR015344   | Vibrio cholerae neuraminidase, lectin-like domain                          |
| IPR002396   | Selectin superfamily                                                                 | IPR015533   | Galectin-4/6                                                               |
| IPR002883   | CBM10/dockerin domain                                                                | IPR015534   | Galectin-3                                                                 |
| IPR002889   | Carbohydrate-binding WSC                                                             | IPR015926   | Cytolysin/lectin                                                           |
| IPR003305   | Carbohydrate-binding, CenC-like                                                      | IPR016186   | C-type lectin-like/link domain superfamily                                 |
| IPR003610   | Carbohydrate-binding module family 5/12                                              | IPR016187   | C-type lectin fold                                                         |
| IPR004302   | Cellulose/chitin-binding protein, N-terminal                                         | IPR016305   | Mannose-6-phosphate isomerase                                              |
| IPR004954   | Putative mucin/carbohydrate-binding domain                                           | IPR016348   | L-selectin                                                                 |
| IPR005036   | CBM21 (carbohydrate binding type-21) domain                                          | IPR016363   | Legume lectin                                                              |
| IPR005052   | Legume-like lectin                                                                   | IPR016817   | Mannose-P-dolichol utilization defect 1 protein                            |
| IPR005084   | Carbohydrate binding module family 6                                                 | IPR016927   | Lectin, sugar-binding                                                      |
| IPR005085   | Carbohydrate binding module family 25                                                | IPR018366   | Carbohydrate-binding type-2, conserved site                                |
| IPR005086   | Carbohydrate binding module family 17/28                                             | IPR018378   | C-type lectin, conserved site                                              |
| IPR005087   | Carbohydrate binding module family 11                                                | IPR018909   | Endo-1,3(4)-beta-glucanase 1, carbohydrate binding                         |
| IPR005088   | Carbohydrate binding module family 15                                                | IPR031798   | Alginate biosynthesis protein AlgX, C-terminal carbohydrate-binding module |
| IPR005089   | Carbohydrate-binding module family 19                                                | IPR032496   | Hemolysin, beta-prism lectin                                               |
| IPR005102   | Carbohydrate binding X2 domain                                                       | IPR032798   | Endoglucanase Z, cellulose-binding domain                                  |
| IPR005310   | PapG, carbohydrate-binding domain                                                    | IPR033734   | Jacalin-like lectin domain, plant                                          |
| IPR005323   | Pullulanase, carbohydrate-binding module 41                                          | IPR033790   | Lectin Bc21-C, N-terminal                                                  |
| IPR006584   | Cellulose binding, type IV                                                           | IPR033801   | CBM6/CBM35/CBM36-like 1                                                    |
| IPR006585   | Fucolectin tachylectin-4 pentraxin-1                                                 | IPR033802   | Carbohydrate-binding protein CttA, X module                                |
| IPR006633   | Carbohydrate-binding/sugar hydrolysis domain                                         | IPR033803   | CBM6/CBM35/CBM36-like 2                                                    |
| IPR007117   | Expansin, cellulose-binding-like domain                                              | IPR033816   | Eosinophil major basic protein, C-type lectin-like domain                  |
| IPR008965   | CBM2/CBM3, carbohydrate-binding domain superfamily                                   | IPR033862   | Putative metalloprotease, Jacalin-like lectin domain                       |
| IPR019019   | H-type lectin domain                                                                 | IPR033987   | Aggrecan/versican, C-type lectin-like domain                               |
| IPR019028   | Carbohydrate binding domain CBM49                                                    | IPR033988   | CEL-1-like C-type lectin-like domain                                       |
| IPR019825   | Legume lectin, beta chain, Mn/Ca-binding site                                        | IPR033989   | CD209-like, C-type lectin-like domain                                      |
| IPR021720   | Malectin domain                                                                      | IPR033990   | Collectin, C-type lectin-like domain                                       |
| IPR022386   | Carbohydrate ABC transporter, N-acetylglucosamine/diacetylchitobiose-binding protein | IPR033991   | Selectin, C-type lectin-like domain                                        |
| IPR022387   | Carbohydrate ABC transporter substrate-binding, CPR0540                              | IPR033992   | Natural killer cell receptor-like, C-type lectin-like domain               |
| IPR023294   | Tachylectin 2                                                                        | IPR034007   | C-type lectin-like domain, bacterial                                       |
| IPR024361   | Bacteroidetes-Associated Carbohydrate-binding Often N-terminal                       | IPR034008   | TC14-like, C-type lectin-like domain                                       |
| IPR024691   | Micronemal protein 1, galectin-like domain                                           | IPR034010   | DGCR2-like, C-type lectin-like domain                                      |
| IPR024788   | Malectin-like domain                                                                 | IPR034011   | Attractin-like, C-type lectin-like domain                                  |
| IPR025112   | Putative carbohydrate metabolism domain                                              | IPR034831   | Laforin, CBM20 domain                                                      |
| IPR025584   | Carbohydrate-binding domain-containing protein Cthe_2159                             | IPR034835   | Beta-amylase, CBM20 domain                                                 |
| IPR026195   | P-selectin glycoprotein ligand 1                                                     | IPR034836   | Glucoamylase, CBM20 domain                                                 |
| IPR027613   | Surface carbohydrate biosynthesis protein, LIC13510 family                           | IPR034838   | Starch-binding domain-containing protein 1, CBM20 domain                   |
| IPR028927   | Mannose-6-phosphate receptor                                                         | IPR034839   | Glycerophosphocholine phosphodiesterase GPCPD1, CBM20 domain               |
| IPR028988   | Hemolytic lectin CEL-III, C-terminal domain superfamily                              | IPR034840   | DPE2, CBM20 domain 1                                                       |

|           |                                                       |           |                                            |
|-----------|-------------------------------------------------------|-----------|--------------------------------------------|
| IPR029665 | GDP-mannose transporter GONST3, plant                 | IPR034841 | DPE2, CBM20 domain 2                       |
| IPR030269 | Plectin                                               | IPR034849 | Maltogenic alpha-amylase, CBM20 domain     |
| IPR030638 | Galectin-8                                            | IPR035310 | Galactose-inhibitable lectin 35kDa subunit |
| IPR030640 | Galectin-7                                            | IPR035661 | EMP46/EMP47, N-terminal lectin domain      |
| IPR030649 | Galectin-12                                           | IPR035664 | VIP36, lectin domain                       |
| IPR030650 | Galectin-16                                           | IPR035665 | VcfQ, lectin domain                        |
| IPR030651 | Galectin-related protein                              | IPR035971 | Cellulose-binding domain superfamily       |
| IPR030652 | Galectin-14                                           | IPR035992 | Ricin B-like lectins                       |
| IPR030653 | Galectin-13                                           |           |                                            |
| IPR035992 | Ricin B-like lectins                                  |           |                                            |
| IPR036404 | Jacalin-like lectin domain superfamily                |           |                                            |
| IPR036426 | Bulb-type lectin domain superfamily                   |           |                                            |
| IPR036573 | Carbohydrate-binding module superfamily 5/12          |           |                                            |
| IPR036601 | CBM10 superfamily                                     |           |                                            |
| IPR036684 | Calcium-mediated lectin superfamily                   |           |                                            |
| IPR036749 | Expansin, cellulose-binding-like domain superfamily   |           |                                            |
| IPR036813 | Tachylectin 2 superfamily                             |           |                                            |
| IPR036966 | Carbohydrate-binding module 3 superfamily             |           |                                            |
| IPR037221 | H-type lectin domain superfamily                      |           |                                            |
| IPR037570 | Mannose-binding protein C                             |           |                                            |
| IPR037571 | Mannan-binding lectin-associated serine peptidase 2   |           |                                            |
| IPR038175 | CBM21 domain superfamily                              |           |                                            |
| IPR038420 | PapG, carbohydrate-binding domain superfamily         |           |                                            |
| IPR038560 | Beta-1,3-xylanase, CBM31 domain superfamily           |           |                                            |
| IPR038637 | NPCBM domain superfamily                              |           |                                            |
| IPR038653 | Putative carbohydrate metabolism domain superfamily   |           |                                            |
| IPR038736 | GDP-mannose transporter Vrg4-like                     |           |                                            |
| IPR039155 | Malectin                                              |           |                                            |
| IPR040249 | Ricin B-like lectin EULS3-like                        |           |                                            |
| IPR040528 | Lectin-like domain                                    |           |                                            |
| IPR040669 | Agarase, CBM-like domain                              |           |                                            |
| IPR040877 | Carbohydrate binding module 65 domain 1               |           |                                            |
| IPR040946 | Endoglucanase B, carbohydrate binding domain          |           |                                            |
| IPR040959 | Cellulose-binding protein CttA, N-terminal            |           |                                            |
| IPR040964 | OAA-family lectin sugar binding domain                |           |                                            |
| IPR041253 | Carbohydrate binding module 77                        |           |                                            |
| IPR041438 | Carbohydrate-binding module 64                        |           |                                            |
| IPR041447 | Mannosidase Ig/CBM-like domain                        |           |                                            |
| IPR042129 | Mannose-binding protein A                             |           |                                            |
| IPR042190 | Killer cell lectin-like receptor subfamily G member 1 |           |                                            |

**Supplementary Table 4. Human-microbial-lectin distribution in body sites**

| Body Site(s)                                                                                 | total |  | Body Site(s)                                                                                                                   | total |
|----------------------------------------------------------------------------------------------|-------|--|--------------------------------------------------------------------------------------------------------------------------------|-------|
| Stool                                                                                        | 2158  |  | Buccal Gingiva Palatine Tonsils R Retroauricular Saliva Subgingival Plaque Supragingival Plaque Throat Tongue                  | 2     |
| Supragingival Plaque                                                                         | 64    |  | Buccal Gingiva Palatine Tonsils Subgingival Plaque Supragingival Plaque Throat Tongue                                          | 2     |
| Buccal Stool                                                                                 | 57    |  | Buccal Gingiva Saliva Subgingival Plaque Supragingival Plaque Tongue                                                           | 2     |
| Buccal Subgingival Plaque Supragingival Plaque Tongue                                        | 26    |  | Buccal Gingiva Subgingival Plaque Supragingival Plaque Throat Tongue                                                           | 2     |
| Subgingival Plaque Supragingival Plaque                                                      | 24    |  | Buccal Palatine Tonsils Saliva Subgingival Plaque Supragingival Plaque Tongue                                                  | 2     |
| Supragingival Plaque Tongue                                                                  | 23    |  | Buccal Saliva Subgingival Plaque Supragingival Plaque Tongue                                                                   | 2     |
| Posterior Fornix                                                                             | 22    |  | Palatine Tonsils Saliva Throat Tongue                                                                                          | 2     |
| Tongue                                                                                       | 21    |  | Palatine Tonsils Subgingival Plaque Supragingival Plaque Throat                                                                | 2     |
| Buccal Palatine Tonsils Supragingival Plaque Throat Tongue                                   | 20    |  | Subgingival Plaque Supragingival Plaque Throat Tongue                                                                          | 2     |
| Stool Subgingival Plaque                                                                     | 20    |  | Gingiva Palatine Tonsils Saliva                                                                                                | 2     |
| Buccal Palatine Tonsils Saliva Subgingival Plaque Supragingival Plaque Throat Tongue         | 18    |  | Buccal Saliva Throat                                                                                                           | 2     |
| Buccal Gingiva Subgingival Plaque Supragingival Plaque Tongue                                | 14    |  | Buccal Throat Tongue                                                                                                           | 2     |
| Palatine Tonsils Supragingival Plaque Throat Tongue                                          | 14    |  | Subgingival Plaque Throat Tongue                                                                                               | 2     |
| Subgingival Plaque Supragingival Plaque Tongue                                               | 14    |  | Buccal Subgingival Plaque                                                                                                      | 2     |
| L Retroauricular Stool                                                                       | 14    |  | Saliva Stool                                                                                                                   | 2     |
| Buccal Palatine Tonsils Subgingival Plaque Supragingival Plaque Throat Tongue                | 13    |  | L Retroauricular                                                                                                               | 2     |
| Buccal Gingiva Palatine Tonsils Saliva Subgingival Plaque Supragingival Plaque Throat Tongue | 12    |  | R Retroauricular                                                                                                               | 2     |
| Buccal Supragingival Plaque Tongue                                                           | 12    |  | Throat                                                                                                                         | 2     |
| Buccal                                                                                       | 11    |  | Anterior Nares Buccal Gingiva Palatine Tonsils R Retroauricular Saliva Subgingival Plaque Supragingival Plaque Throat Tongue   | 1     |
| Saliva                                                                                       | 11    |  | Buccal Gingiva L Retroauricular Palatine Tonsils R Retroauricular Saliva Subgingival Plaque Supragingival Plaque Throat Tongue | 1     |
| Buccal Palatine Tonsils Saliva Supragingival Plaque Throat Tongue                            | 10    |  | Anterior Nares Buccal Gingiva Palatine Tonsils R Retroauricular Supragingival Plaque Throat Tongue                             | 1     |
| Vaginal Introitus                                                                            | 9     |  | Buccal Palatine Tonsils Saliva Stool Subgingival Plaque Supragingival Plaque Throat Tongue                                     | 1     |
| Palatine Tonsils Subgingival Plaque Supragingival Plaque                                     | 8     |  | Buccal Gingiva Palatine Tonsils Saliva Subgingival Plaque Supragingival Plaque Tongue                                          | 1     |
| Subgingival Plaque                                                                           | 8     |  | Buccal Palatine Tonsils Saliva Stool Subgingival Plaque Supragingival Plaque Throat                                            | 1     |
| Buccal Palatine Tonsils Saliva Throat Tongue                                                 | 7     |  | Buccal Gingiva Palatine Tonsils Saliva Supragingival Plaque Tongue                                                             | 1     |
| Palatine Tonsils Subgingival Plaque Supragingival Plaque Throat Tongue                       | 7     |  | Buccal Gingiva Palatine Tonsils Supragingival Plaque Throat Tongue                                                             | 1     |
| Buccal Supragingival Plaque Throat Tongue                                                    | 7     |  | Buccal Gingiva Saliva Supragingival Plaque Throat Tongue                                                                       | 1     |
| Mid Vagina Vaginal Introitus                                                                 | 7     |  | Buccal Gingiva Palatine Tonsils Subgingival Plaque Supragingival Plaque                                                        | 1     |
| Stool Supragingival Plaque                                                                   | 7     |  | Buccal Gingiva Saliva Supragingival Plaque Tongue                                                                              | 1     |
| Supragingival Plaque Throat Tongue                                                           | 6     |  | Buccal Palatine Tonsils Saliva Stool Throat                                                                                    | 1     |
| Anterior Nares Buccal Gingiva Palatine Tonsils Saliva Supragingival Plaque Throat Tongue     | 5     |  | Buccal Palatine Tonsils Stool Throat Tongue                                                                                    | 1     |
| Buccal Subgingival Plaque Supragingival Plaque                                               | 5     |  | Buccal Palatine Tonsils Subgingival Plaque Supragingival Plaque Throat                                                         | 1     |
| Buccal Gingiva Palatine Tonsils Saliva Supragingival Plaque Throat Tongue                    | 4     |  | Buccal Palatine Tonsils Subgingival Plaque Throat Tongue                                                                       | 1     |
| Buccal Gingiva Supragingival Plaque Tongue                                                   | 4     |  | Palatine Tonsils Stool Supragingival Plaque Throat Tongue                                                                      | 1     |
| Palatine Tonsils Supragingival Plaque Tongue                                                 | 4     |  | Anterior Nares Supragingival Plaque Throat Tongue                                                                              | 1     |
| Palatine Tonsils Throat Tongue                                                               | 4     |  | Buccal Palatine Tonsils Supragingival Plaque Tongue                                                                            | 1     |
| Saliva Subgingival Plaque Supragingival Plaque                                               | 4     |  | Buccal Saliva Stool Throat                                                                                                     | 1     |

|                                                                        |   |  |                                                     |   |
|------------------------------------------------------------------------|---|--|-----------------------------------------------------|---|
| Throat Tongue                                                          | 4 |  | Palatine Tonsils Saliva Supragingival Plaque Tongue | 1 |
| Mid Vagina                                                             | 4 |  | Buccal Gingiva Palatine Tonsils                     | 1 |
| Buccal Palatine Tonsils Subgingival Plaque Supragingival Plaque Tongue | 3 |  | Buccal Gingiva Supragingival Plaque                 | 1 |
| Buccal Subgingival Plaque Supragingival Plaque Throat Tongue           | 3 |  | Gingiva Palatine Tonsils Subgingival Plaque         | 1 |
| Palatine Tonsils Saliva Subgingival Plaque Supragingival Plaque Tongue | 3 |  | Buccal Stool Subgingival Plaque                     | 1 |
| Buccal Palatine Tonsils Throat Tongue                                  | 3 |  | Buccal Stool Tongue                                 | 1 |
| Palatine Tonsils Subgingival Plaque Supragingival Plaque Tongue        | 3 |  | Buccal Subgingival Plaque Tongue                    | 1 |
| Anterior Nares L Retroauricular R Retroauricular                       | 3 |  | L Retroauricular Stool Tongue                       | 1 |
| Mid Vagina Posterior Fornix Vaginal Introitus                          | 3 |  | Saliva Subgingival Plaque Throat                    | 1 |
| Stool Supragingival Plaque Tongue                                      | 3 |  | Saliva Supragingival Plaque Tongue                  | 1 |
| Subgingival Plaque Supragingival Plaque Throat                         | 3 |  | Stool Throat Tongue                                 | 1 |
| Buccal Supragingival Plaque                                            | 3 |  | Buccal Gingiva                                      | 1 |
| Buccal Tongue                                                          | 3 |  | Gingiva Palatine Tonsils                            | 1 |
| L Retroauricular R Retroauricular                                      | 3 |  | Palatine Tonsils Supragingival Plaque               | 1 |
| Palatine Tonsils Tongue                                                | 3 |  | Palatine Tonsils Throat                             | 1 |
| Stool Throat                                                           | 3 |  | R Retroauricular Stool                              | 1 |
| Gingiva                                                                | 3 |  | Stool Tongue                                        | 1 |
| Palatine Tonsils                                                       | 3 |  | Stool Vaginal Introitus                             | 1 |
|                                                                        |   |  | Subgingival Plaque Throat                           | 1 |
|                                                                        |   |  | Anterior Nares                                      | 1 |



**Supplementary Table 5.** Unique human-microbial-lectins per body site

| <b>Body Site</b>     | <b>Total Lectin Genes Per Body Site</b> | <b>Lectin Genes Specific to Body Site</b> | <b>Percent Unique Lectin Genes in Each Body Site</b> |
|----------------------|-----------------------------------------|-------------------------------------------|------------------------------------------------------|
| Anterior Nares       | 12                                      | 1                                         | 8                                                    |
| Gingiva              | 69                                      | 3                                         | 4                                                    |
| Buccal               | 282                                     | 11                                        | 4                                                    |
| L Retroauricular     | 26                                      | 2                                         | 8                                                    |
| Mid Vagina           | 14                                      | 4                                         | 28                                                   |
| Palatine Tonsil      | 179                                     | 3                                         | 2                                                    |
| Posterior Fornix     | 25                                      | 22                                        | 88                                                   |
| Saliva               | 105                                     | 11                                        | 10                                                   |
| Stool                | 2278                                    | 2158                                      | 95                                                   |
| R Retroauricular     | 14                                      | 2                                         | 14                                                   |
| Subgingival plaque   | 224                                     | 8                                         | 4                                                    |
| Supragingival plaque | 384                                     | 64                                        | 17                                                   |
| Throat               | 183                                     | 2                                         | 1                                                    |
| Tongue               | 316                                     | 21                                        | 7                                                    |
| Vaginal introitus    | 20                                      | 9                                         | 45                                                   |
| Total                | 2807*                                   | 2321                                      |                                                      |

\* It is not the sum of the column which would include protein sequences found at multiple body sites but the total unique protein sequences across all body sites.

**Supplementary Table 6.** Cloning primers

| <b>Protein Variant</b>                    | <b>Subcloning Primers <sup>a</sup></b>                                                           | <b>Restriction Sites</b> |
|-------------------------------------------|--------------------------------------------------------------------------------------------------|--------------------------|
| His <sub>6</sub> -Cbeg5 <sup>21-957</sup> | F: GAGAC <u>CATATG</u> CAAAGTCTGGAACAGACCACAG<br>R: GAGACTCGAG <b>CT</b> ACCGCCGTTTTTTGGACAAC    | NdeI<br>XhoI             |
| His <sub>6</sub> -Cbeg5-FN                | F: GAGAC <u>CATATG</u> CCGCTTCCGGTGAATCACT<br>R: GAGACTCGAG <b>CT</b> AATAGGCAGACAGAATTTTCGGAAGG | NdeI<br>XhoI             |
| GFP-Cbeg5-CBM                             | F: CTGAGCGGCCG <u>CGT</u> GTTTACGCCAC<br>R: CTGACTCGAGGCCCGCACAATGTT                             | NotI<br>XhoI             |
| GFP-Cbeg4-CBM                             | F: CTGAGCGGCCG <u>CGT</u> TATACCCCTCG<br>R: CTGACTCGAGACCGCGGATAT                                | NotI<br>XhoI             |

<sup>a</sup> Restriction site is underlined. Stop codon is bolded.
